# Supplementary material
Source: publisher figshare collection journal article supplement (https://asha.figshare.com/articles/dataset/_/7291940)
Supplement: Supplementary file 1 [file 1]

**Supplemental Material S2.** Confusion matrices for each vowel for each condition for Speaker Two, where numbers are raw values and indicate the number of tokens identified out of the corpus of 80 classifications per vowel; target vowels are indicated with phonetic (International Phonetic Alphabet [IPA]) notation; corresponding perceived vowels are indicated with orthographic notation.

| <b>Original</b><br><i>Target</i> | <i>Perceived</i> |    |    |    |    |    |    |    |    |    |    | <b>% Accuracy</b> |
|----------------------------------|------------------|----|----|----|----|----|----|----|----|----|----|-------------------|
|                                  | ei               | ar | ae | iy | er | eh | ih | oa | uu | ah | uh |                   |
| /e/                              | 68               | 0  | 0  | 5  | 1  | 2  | 4  | 0  | 0  | 0  | 0  | 85.00%            |
| aR                               | 0                | 79 | 0  | 0  | 1  | 0  | 0  | 0  | 0  | 0  | 0  | 98.75%            |
| /ae/                             | 1                | 0  | 65 | 0  | 0  | 14 | 0  | 0  | 0  | 0  | 0  | 81.25%            |
| /i/                              | 7                | 0  | 0  | 72 | 0  | 1  | 0  | 0  | 0  | 0  | 0  | 90.00%            |
| eR                               | 0                | 1  | 0  | 0  | 74 | 0  | 0  | 2  | 0  | 0  | 3  | 92.50%            |
| /E/                              | 0                | 1  | 46 | 0  | 3  | 27 | 0  | 0  | 0  | 0  | 3  | 33.75%            |
| /I/                              | 1                | 0  | 1  | 0  | 1  | 40 | 34 | 0  | 0  | 1  | 2  | 42.50%            |
| /o/                              | 0                | 0  | 0  | 0  | 0  | 0  | 0  | 79 | 1  | 0  | 0  | 98.75%            |
| /u/                              | 0                | 0  | 0  | 0  | 0  | 0  | 0  | 1  | 79 | 0  | 0  | 98.75%            |
| /a/                              | 0                | 8  | 4  | 0  | 0  | 0  | 0  | 0  | 0  | 66 | 2  | 82.50%            |
| /ʌ/                              | 0                | 0  | 1  | 0  | 0  | 2  | 0  | 0  | 0  | 6  | 71 | 88.75%            |

| <b>Resampled</b><br><i>Target</i> | <i>Perceived</i> |    |    |    |    |    |    |    |    |    |    | <b>% Accuracy</b> |
|-----------------------------------|------------------|----|----|----|----|----|----|----|----|----|----|-------------------|
|                                   | ei               | ar | ae | iy | er | eh | ih | oa | uu | ah | uh |                   |
| /e/                               | 71               | 0  | 0  | 2  | 0  | 1  | 6  | 0  | 0  | 0  | 0  | 88.75%            |
| aR                                | 0                | 79 | 0  | 0  | 0  | 1  | 0  | 0  | 0  | 0  | 0  | 98.75%            |
| /ae/                              | 0                | 0  | 73 | 2  | 0  | 5  | 0  | 0  | 0  | 0  | 0  | 91.25%            |
| /i/                               | 5                | 0  | 0  | 73 | 0  | 1  | 1  | 0  | 0  | 0  | 0  | 91.25%            |
| eR                                | 0                | 1  | 2  | 0  | 72 | 0  | 0  | 1  | 0  | 2  | 2  | 90.00%            |
| /E/                               | 0                | 0  | 43 | 0  | 3  | 30 | 0  | 0  | 0  | 0  | 4  | 37.50%            |
| /I/                               | 1                | 0  | 1  | 0  | 3  | 26 | 45 | 0  | 1  | 0  | 3  | 56.25%            |
| /o/                               | 0                | 0  | 0  | 1  | 0  | 0  | 0  | 77 | 2  | 0  | 0  | 96.25%            |
| /u/                               | 0                | 0  | 0  | 0  | 0  | 0  | 0  | 2  | 78 | 0  | 0  | 97.50%            |
| /a/                               | 0                | 6  | 2  | 0  | 0  | 0  | 0  | 0  | 0  | 69 | 1  | 86.25%            |
| /ʌ/                               | 0                | 0  | 0  | 0  | 1  | 0  | 0  | 0  | 0  | 3  | 74 | 92.50%            |

| <b>Transcoded</b><br><i>Target</i> | <i>Perceived</i> |    |    |    |    |    |    |    |    |    |    | <b>% Accuracy</b> |
|------------------------------------|------------------|----|----|----|----|----|----|----|----|----|----|-------------------|
|                                    | ei               | ar | ae | iy | er | eh | ih | oa | uu | ah | uh |                   |
| /e/                                | 61               | 0  | 0  | 2  | 1  | 4  | 12 | 0  | 0  | 0  | 0  | 76.25%            |
| aR                                 | 0                | 79 | 0  | 0  | 1  | 0  | 0  | 0  | 0  | 0  | 0  | 98.75%            |
| /ae/                               | 0                | 0  | 66 | 0  | 1  | 13 | 0  | 0  | 0  | 0  | 0  | 82.50%            |
| /i/                                | 6                | 0  | 0  | 73 | 0  | 1  | 0  | 0  | 0  | 0  | 0  | 91.25%            |
| eR                                 | 0                | 1  | 0  | 0  | 74 | 0  | 0  | 3  | 1  | 0  | 1  | 92.50%            |
| /E/                                | 0                | 0  | 32 | 0  | 4  | 34 | 0  | 0  | 0  | 0  | 7  | 42.50%            |
| /I/                                | 0                | 0  | 0  | 0  | 2  | 24 | 48 | 2  | 2  | 1  | 1  | 60.00%            |

|     |   |   |   |   |   |   |   |    |    |    |    |        |
|-----|---|---|---|---|---|---|---|----|----|----|----|--------|
| /o/ | 0 | 0 | 0 | 0 | 1 | 0 | 0 | 77 | 2  | 0  | 0  | 96.25% |
| /u/ | 0 | 0 | 0 | 0 | 0 | 0 | 1 | 0  | 79 | 0  | 0  | 98.75% |
| /a/ | 0 | 5 | 2 | 0 | 0 | 0 | 0 | 0  | 0  | 73 | 0  | 91.25% |
| /^/ | 0 | 0 | 3 | 0 | 1 | 1 | 0 | 2  | 0  | 11 | 62 | 77.50% |
