# Supplementary material
Source: publisher figshare collection journal article supplement (https://asha.figshare.com/articles/dataset/_/7291940)
Supplement: Supplementary file 2 [file 1]

**Supplemental Material S1.** Confusion matrices for each vowel for each condition for Speaker One, where numbers are raw values and indicate the number of tokens identified out of the corpus of 80 classifications per vowel; target vowels are indicated with phonetic (International Phonetic Alphabet [IPA]) notation; corresponding perceived vowels are indicated with orthographic notation.

| <b>Original</b><br><i>Target</i> | <i>Perceived</i> |    |    |    |    |    |    |    |    |    |    | <b>% Accuracy</b> |
|----------------------------------|------------------|----|----|----|----|----|----|----|----|----|----|-------------------|
|                                  | ei               | ar | ae | iy | er | eh | ih | oa | uu | ah | uh |                   |
| /e/                              | 67               | 0  | 0  | 5  | 0  | 0  | 6  | 2  | 0  | 0  | 0  | 83.75%            |
| aR                               | 0                | 79 | 0  | 0  | 1  | 0  | 0  | 0  | 0  | 0  | 0  | 98.75%            |
| /ae/                             | 0                | 0  | 18 | 0  | 0  | 62 | 0  | 0  | 0  | 0  | 0  | 22.50%            |
| /i/                              | 0                | 0  | 1  | 77 | 0  | 2  | 0  | 0  | 0  | 0  | 0  | 96.25%            |
| eR                               | 0                | 8  | 0  | 0  | 71 | 0  | 0  | 1  | 0  | 0  | 0  | 88.75%            |
| /E/                              | 0                | 0  | 0  | 0  | 2  | 71 | 7  | 0  | 0  | 0  | 0  | 88.75%            |
| /I/                              | 1                | 0  | 1  | 0  | 0  | 17 | 61 | 0  | 0  | 0  | 0  | 76.25%            |
| /o/                              | 0                | 0  | 0  | 0  | 10 | 2  | 0  | 55 | 7  | 0  | 6  | 68.75%            |
| /u/                              | 0                | 0  | 0  | 1  | 1  | 0  | 4  | 0  | 74 | 0  | 0  | 92.50%            |
| /a/                              | 0                | 0  | 0  | 0  | 0  | 0  | 0  | 0  | 0  | 79 | 1  | 98.75%            |
| /^/                              | 0                | 0  | 1  | 0  | 8  | 28 | 1  | 0  | 0  | 0  | 42 | 52.50%            |

| <b>Resampled</b><br><i>Target</i> | <i>Perceived</i> |    |    |    |    |    |    |    |    |    |    | <b>% Accuracy</b> |
|-----------------------------------|------------------|----|----|----|----|----|----|----|----|----|----|-------------------|
|                                   | ei               | ar | ae | iy | er | eh | ih | oa | uu | ah | uh |                   |
| /e/                               | 67               | 0  | 0  | 8  | 0  | 1  | 2  | 0  | 2  | 0  | 0  | 83.75%            |
| aR                                | 0                | 77 | 0  | 0  | 1  | 0  | 0  | 2  | 0  | 0  | 0  | 96.25%            |
| /ae/                              | 0                | 0  | 13 | 0  | 0  | 67 | 0  | 0  | 0  | 0  | 0  | 16.25%            |
| /i/                               | 1                | 0  | 0  | 78 | 0  | 1  | 0  | 0  | 0  | 0  | 0  | 97.50%            |
| eR                                | 1                | 4  | 0  | 0  | 72 | 0  | 0  | 0  | 0  | 0  | 3  | 90.00%            |
| /E/                               | 0                | 0  | 2  | 0  | 1  | 70 | 5  | 1  | 0  | 0  | 1  | 87.50%            |
| /I/                               | 3                | 0  | 0  | 1  | 0  | 11 | 65 | 0  | 0  | 0  | 0  | 81.25%            |
| /o/                               | 0                | 0  | 0  | 0  | 8  | 2  | 0  | 54 | 9  | 0  | 7  | 67.50%            |
| /u/                               | 1                | 0  | 0  | 2  | 3  | 1  | 1  | 1  | 71 | 0  | 0  | 88.75%            |
| /a/                               | 0                | 2  | 1  | 0  | 0  | 0  | 0  | 0  | 0  | 76 | 1  | 95.00%            |
| /^/                               | 0                | 0  | 1  | 0  | 7  | 35 | 1  | 0  | 0  | 0  | 36 | 45.00%            |

| <b>Transcoded</b><br><i>Target</i> | <i>Perceived</i> |    |    |    |    |    |    |    |    |    |    | <b>% Accuracy</b> |
|------------------------------------|------------------|----|----|----|----|----|----|----|----|----|----|-------------------|
|                                    | ei               | ar | ae | iy | er | eh | ih | oa | uu | ah | uh |                   |
| /e/                                | 22               | 0  | 1  | 29 | 0  | 3  | 23 | 0  | 2  | 0  | 0  | 27.50%            |
| aR                                 | 0                | 79 | 0  | 0  | 1  | 0  | 0  | 0  | 0  | 0  | 0  | 98.75%            |
| /ae/                               | 0                | 0  | 12 | 0  | 0  | 68 | 0  | 0  | 0  | 0  | 0  | 15.00%            |
| /i/                                | 1                | 0  | 1  | 76 | 0  | 1  | 1  | 0  | 0  | 0  | 0  | 95.00%            |
| eR                                 | 0                | 6  | 0  | 0  | 68 | 0  | 0  | 1  | 4  | 0  | 1  | 85.00%            |

|     |   |   |   |   |   |    |    |    |    |    |    |        |
|-----|---|---|---|---|---|----|----|----|----|----|----|--------|
| /E/ | 0 | 0 | 1 | 0 | 4 | 72 | 2  | 1  | 0  | 0  | 0  | 90.00% |
| /I/ | 1 | 0 | 2 | 0 | 0 | 12 | 63 | 0  | 2  | 0  | 0  | 78.75% |
| /o/ | 0 | 0 | 0 | 0 | 9 | 1  | 0  | 37 | 13 | 0  | 20 | 46.25% |
| /u/ | 0 | 0 | 0 | 3 | 0 | 2  | 3  | 1  | 70 | 0  | 1  | 87.50% |
| /a/ | 0 | 2 | 0 | 0 | 0 | 0  | 0  | 1  | 0  | 77 | 0  | 96.25% |
| /^/ | 0 | 0 | 1 | 0 | 7 | 37 | 0  | 0  | 1  | 0  | 34 | 42.50% |
